# Supplementary material for: Stress, coping, resilience, and sleep during the COVID‐19 pandemic: A representative survey study of US adults
Source: PubMed Central journal article supplement (PMC8613418; doi:10.1002/brb3.2384), 2021-10-17
Supplement: BRB3-11-e2384-s001.pdf [file BRB3-11-e2384-s001.pdf]

*Supplemental Table 1.* Bivariate associations of pandemic-related stress of COVID-19 and coping with demographics and resilience.

| Variable                     |          | Pandemic-Related Stress | Primary Control Engagement Coping | Secondary Control Engagement Coping | Disengagement Coping | Involuntary Engagement | Involuntary Disengagement |
|------------------------------|----------|-------------------------|-----------------------------------|-------------------------------------|----------------------|------------------------|---------------------------|
| Age                          | <i>r</i> | <b>-.201</b>            | -.025                             | -.005                               | <b>-.213</b>         | <b>-.165</b>           | <b>-.275</b>              |
|                              | <i>p</i> | <b>&lt;.0001</b>        | .623                              | .923                                | <b>&lt;.0001</b>     | <b>.001</b>            | <b>&lt;.0001</b>          |
|                              | <i>n</i> | <b>393</b>              | 393                               | 393                                 | <b>393</b>           | <b>393</b>             | <b>393</b>                |
| Gender                       | <i>r</i> | -.098                   | <b>-.171</b>                      | -.031                               | <b>-.109</b>         | -.093                  | <b>-.118</b>              |
|                              | <i>p</i> | .052                    | <b>.001</b>                       | .542                                | <b>.030</b>          | .064                   | <b>.019</b>               |
|                              | <i>n</i> | 393                     | <b>393</b>                        | 393                                 | <b>393</b>           | 393                    | <b>393</b>                |
| Race/Ethnicity               | <i>F</i> | .795                    | 1.895                             | <b>3.008</b>                        | .805                 | .846                   | 2.270                     |
|                              | <i>p</i> | .497                    | .130                              | <b>.030</b>                         | .492                 | .469                   | .080                      |
|                              | <i>n</i> | 389                     | 389                               | <b>389</b>                          | 389                  | 389                    | 389                       |
| Subjective SES               | <i>r</i> | <b>-.115</b>            | .062                              | .074                                | <b>-.139</b>         | <b>-.112</b>           | <b>-.178</b>              |
|                              | <i>p</i> | <b>.022</b>             | .220                              | .141                                | <b>.006</b>          | <b>.027</b>            | <b>&lt;.001</b>           |
|                              | <i>n</i> | <b>393</b>              | 393                               | 393                                 | <b>393</b>           | <b>393</b>             | <b>393</b>                |
| Education Level              | <i>r</i> | -.017                   | <b>.125</b>                       | -.030                               | -.015                | .017                   | -.009                     |
|                              | <i>p</i> | .731                    | <b>.013</b>                       | .548                                | .767                 | .734                   | .863                      |
|                              | <i>n</i> | 393                     | <b>393</b>                        | 393                                 | 393                  | 393                    | 393                       |
| Unemployed, Looking for Work | <i>r</i> | <b>.114</b>             | -.010                             | -.024                               | .042                 | .020                   | .053                      |
|                              | <i>p</i> | <b>.024</b>             | .839                              | .630                                | .411                 | .694                   | .291                      |
|                              | <i>n</i> | <b>393</b>              | 393                               | 393                                 | 393                  | 393                    | 393                       |
| Objective Infection Rate     | <i>r</i> | <b>.134</b>             | .098                              | .062                                | <b>.102</b>          | .065                   | <b>.116</b>               |
|                              | <i>p</i> | <b>.008</b>             | .054                              | .219                                | <b>.043</b>          | .198                   | <b>.022</b>               |
|                              | <i>n</i> | <b>392</b>              | 392                               | 392                                 | <b>392</b>           | 392                    | <b>392</b>                |
| Objective Mortality Rate     | <i>r</i> | .098                    | .072                              | .042                                | .072                 | .043                   | .079                      |
|                              | <i>p</i> | .057                    | .163                              | .418                                | .163                 | .402                   | .128                      |
|                              | <i>n</i> | 375                     | 375                               | 375                                 | 375                  | 375                    | 375                       |
| Brief Resilience Scale       | <i>r</i> | <b>-.333</b>            | .060                              | <b>.371</b>                         | <b>-.253</b>         | <b>-.445</b>           | <b>-.394</b>              |
|                              | <i>p</i> | <b>&lt;.0001</b>        | .239                              | <b>&lt;.0001</b>                    | <b>&lt;.0001</b>     | <b>&lt;.0001</b>       | <b>&lt;.0001</b>          |
|                              | <i>n</i> | <b>393</b>              | 393                               | <b>393</b>                          | <b>393</b>           | <b>393</b>             | <b>393</b>                |

Notes: **Bold** signifies significance at  $p < .05$ . Gender (0 = woman; 1 = man); Employment status (0 = Not unemployed, looking for work; 1 = Unemployed, looking for work). Continuous variables are coded such that higher is "more/greater" of the variable. Race is a categorical variable and F-tests from ANOVAs are reported.
